# Supplementary material
Source: PubMed Central journal article supplement (PMC1224680)
Supplement: 7600790s1.pdf [file 7600790s1.pdf]

## Dimer Nearest Neighbor

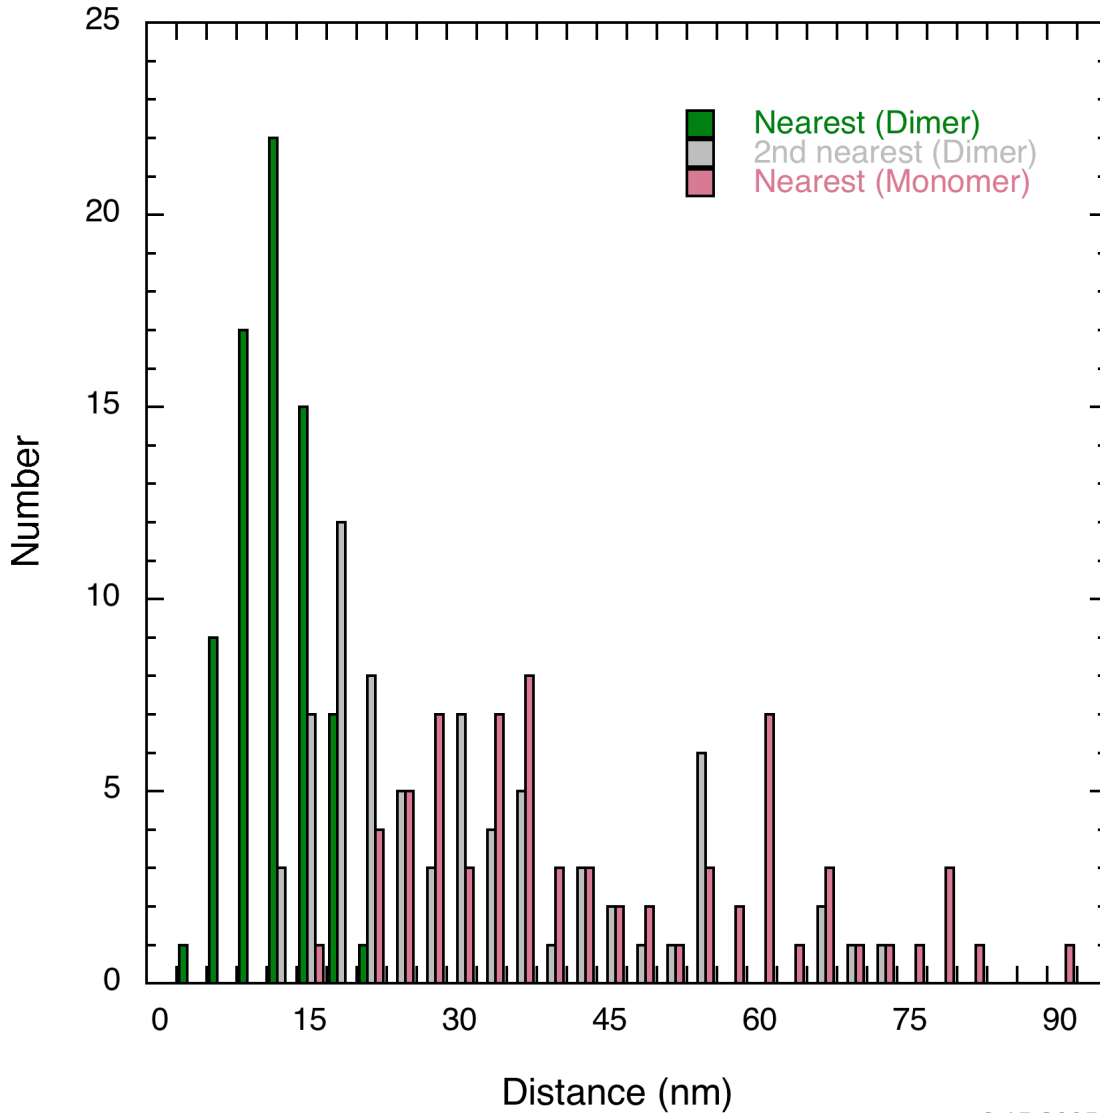

6.15.2005

**Supplementary Data:** Distance from one particle of a dimer to the nearest particle (head-to-head distance) and the second nearest particle compared to distance from monomer particles to the next nearest particle. The data show that the two particles of the pairs are nonrandomly distributed with respect to one another, but the paired particles, or dimers, themselves are widely distributed, resembling the monomer particles in their distribution.
