# Supplementary material
Source: PubMed Central journal article supplement (PMC1224680)
Supplement: 7600790s2.pdf [file 7600790s2.pdf]

## SDS-PAGE of S-200 Gel Filtration Chromatography

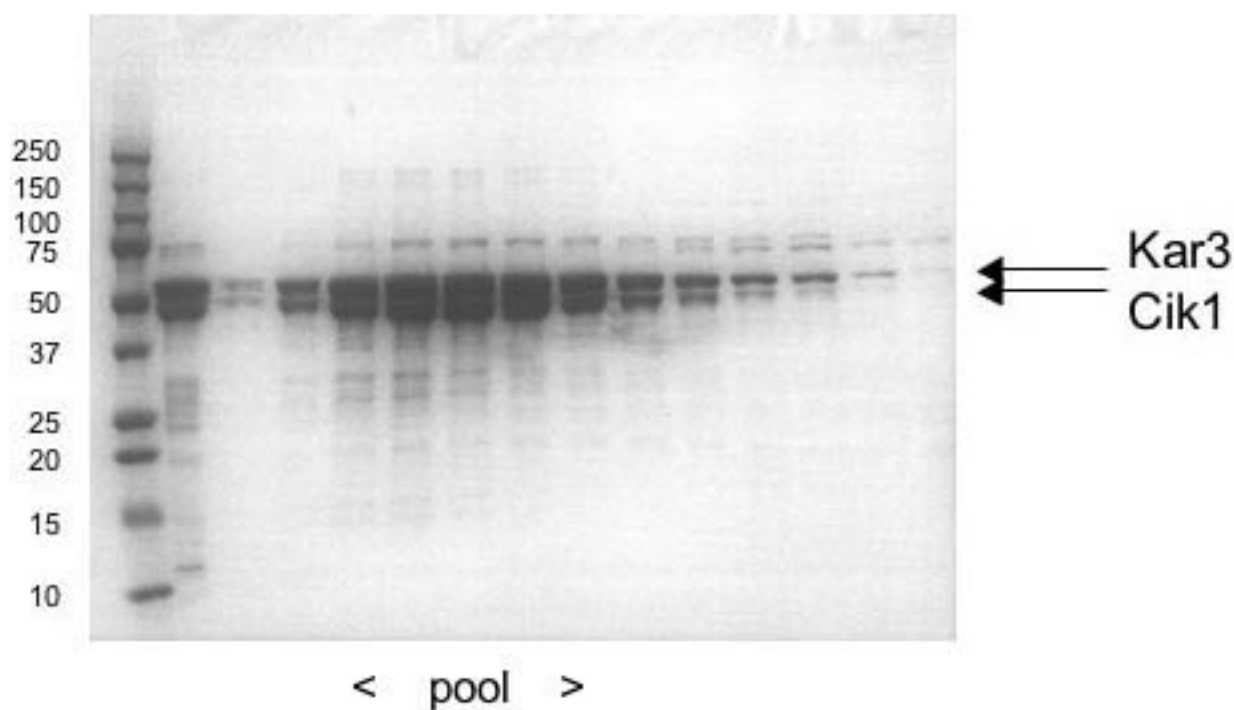

## SDS-PAGE of SP-Sepharose Chromatography

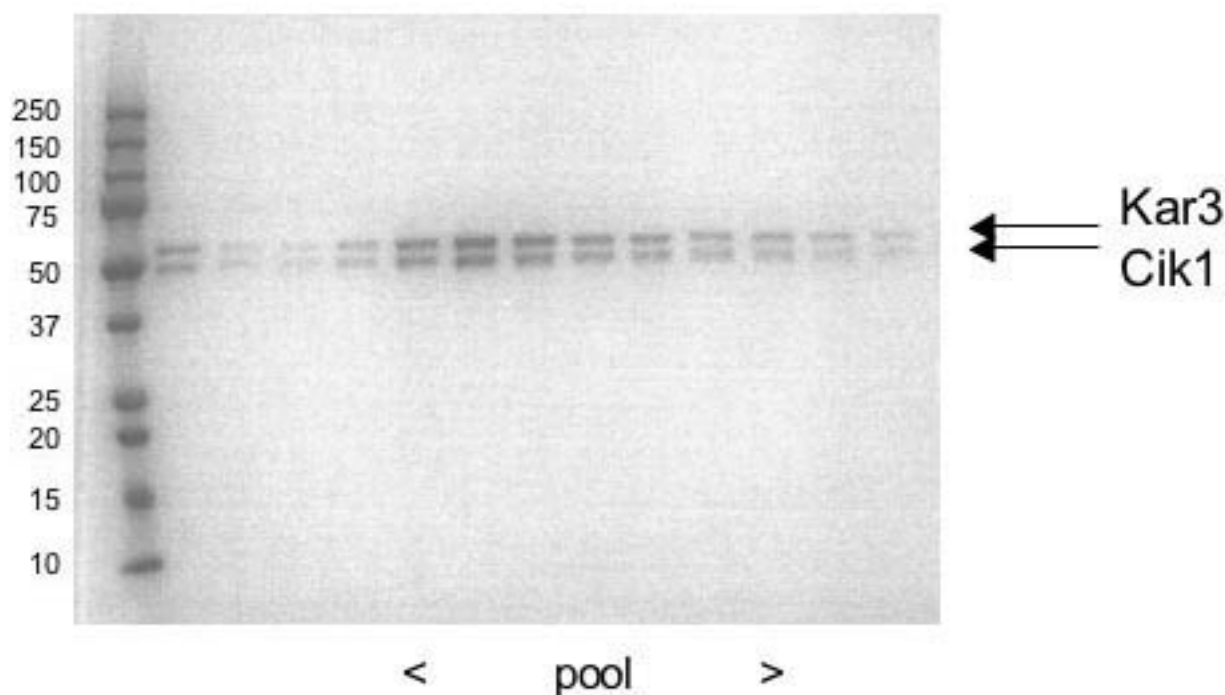

**Supplementary Data:** His6Kar3/Cik1-S tag purification
