# Supplementary material
Source: PubMed Central journal article supplement (PMC1224680)

## Cik1-Kar3 CC

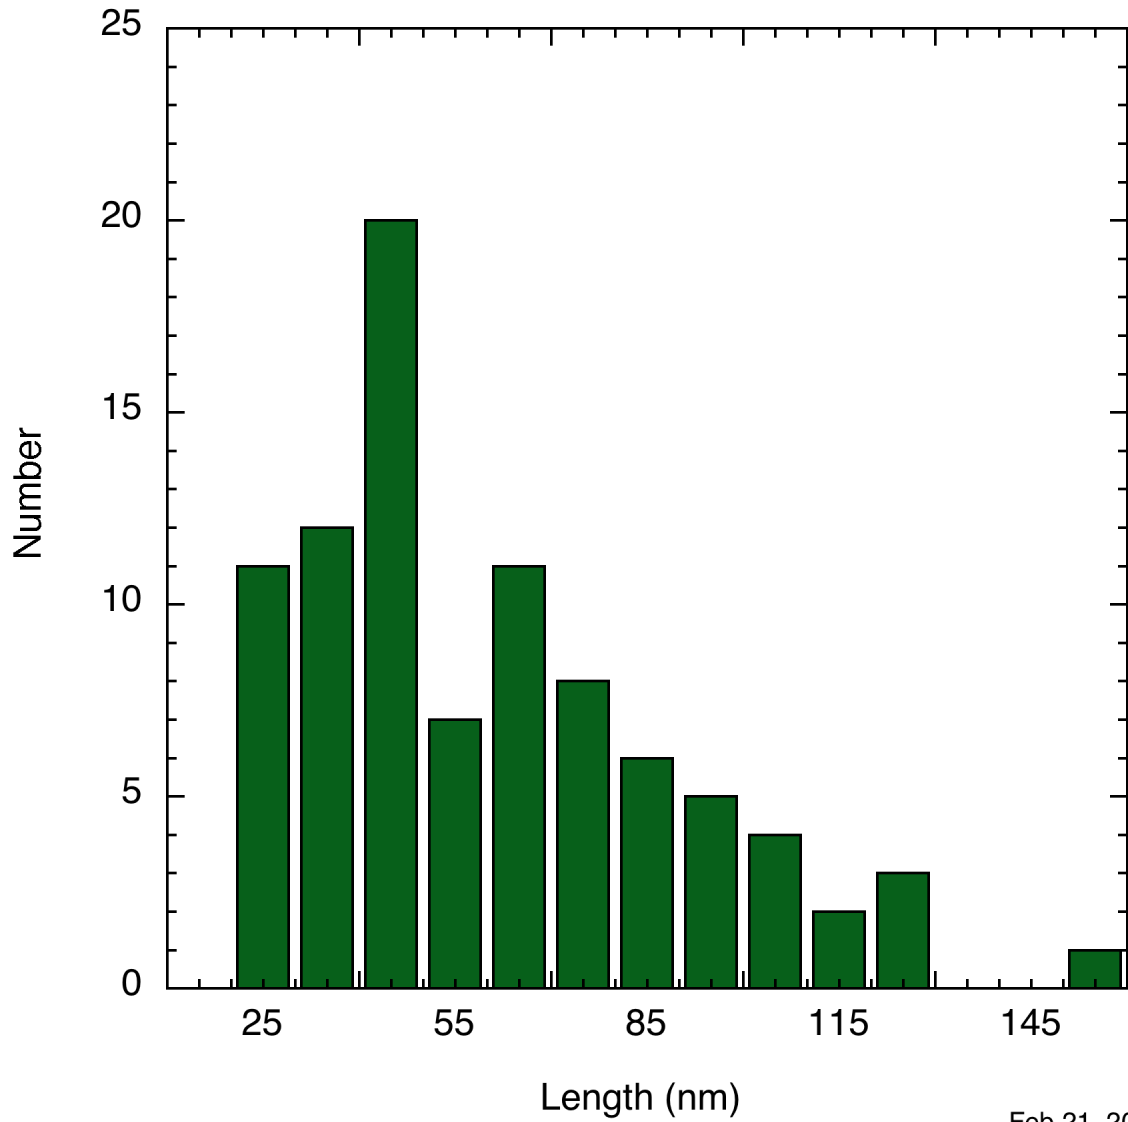

Feb 21, 2005

**Supplementary Data:** Lengths of Cik1-Kar3 CC molecules by rotary shadow EM.

Supplement: 7600790s3.pdf [file 7600790s3.pdf]
